# Supplementary material
Source: PubMed Central journal article supplement (PMC3403683)
Supplement: NIHMS389135-supplement-Box.pdf [file NIHMS389135-supplement-Box.pdf]

## Supplementary Information S1 (Box) | FRET measurements in cells

**Förster (or Fluorescence) Resonant Energy Transfer (FRET)** is a photophysical process where a donor probe transfers its excited-state energy to a proximal probe, the acceptor, in a non-radiative way via dipole-dipole interaction. Efficient FRET requires the following conditions:

- A substantial overlap between the spectra of the donor emission and acceptor absorption.
- Close proximity ( $R$ ) between the donor and the acceptor of 1-10nm (around the Förster distance,  $R_0$ )<sup>103</sup>.
- Favorable orientation of the donor and acceptor dipoles

$$ET = \frac{R_0^6}{R_0^6 + R^6}$$

Thus, measuring FRET signals is a useful way to adequately report on tight bimolecular interactions (see Fig. 3A). For live cell imaging, chimeric proteins of interest with CFP and YFP variants are often used as donor-acceptor FRET pairs<sup>101</sup>. Otherwise, a large selection of synthetic fluorescent FRET pairs exists. Upon conducting careful control measurements, energy transfer ( $ET$ ) can be reported in several different ways<sup>104</sup>. We specify below the most popular ones for cell imaging:

**Sensitized emission** - reported via donor and acceptor detected emissions ( $I_D$  and  $I_A$ , respectively). This technique is compatible with live cell imaging but requires a set of controls to discern emission leakage between channels and direct excitation of the acceptor (resulting in the correction factor  $\gamma$ )

$$ET = \frac{I_A}{I_A + \gamma I_D}$$

**Acceptor photobleaching** – a simpler way of measuring ET via the comparison of donor emission in the presence of the acceptor ( $I_{DA}$ ) and its recovery upon acceptor photobleaching ( $I_D$ ). This method is less compatible with live cell imaging due to its sequential and irreversible nature.

$$ET = 1 - \frac{I_{DA}}{I_D}$$

**Donor fluorescent lifetime imaging (FLIM)** – FRET quenches the donor emission, thus causing a shortening of its lifetime ( $\tau_{DA}$ ) in close proximity to an acceptor in respect to its unquenched lifetime ( $\tau_D$ ). This technique is likely the most direct measurement of ET but requires a specialized FLIM system.

$$ET = 1 - \frac{\tau_{DA}}{\tau_D}$$
